# Supplementary material for: The synthesis and application of o-carborane-based macrocyclic arenes
Source: Royal Society of Chemistry journal article supplement (doi:10.1039/d4dt02001d), 2024-01-01
Supplement: d4dt02001d1.pdf [file d4dt02001d1.pdf]

## Supporting Information

### **The synthesis and application of o-carborane-based macrocyclic arenes**

Jiayi Liu,<sup>a</sup> Meigui Fu,<sup>a</sup> Shuai Yuan,<sup>a</sup> Caixia Lin,<sup>\*a</sup> and Yaofeng Yuan<sup>\*a</sup>

*a Key Laboratory of Molecule Synthesis and Function Discovery (Fujian Province University), Department of Chemistry, Fuzhou University, Fuzhou 350108, China.*

Email: lincaixia\_fzu@fzu.edu.cn; yaofeng.yuan@fzu.edu.cn.

### **Table of Contents**

|                                                              |    |
|--------------------------------------------------------------|----|
| <b>1. NMR Spectra and HR-MS (ESI) of New Compounds</b> ..... | 1  |
| <b>2. Crystal Data and DFT Calculations</b> .....            | 10 |
| <b>3. Fluorescence Properties</b> .....                      | 21 |

# 1. NMR Spectra and HR-MS (ESI) of New Compounds

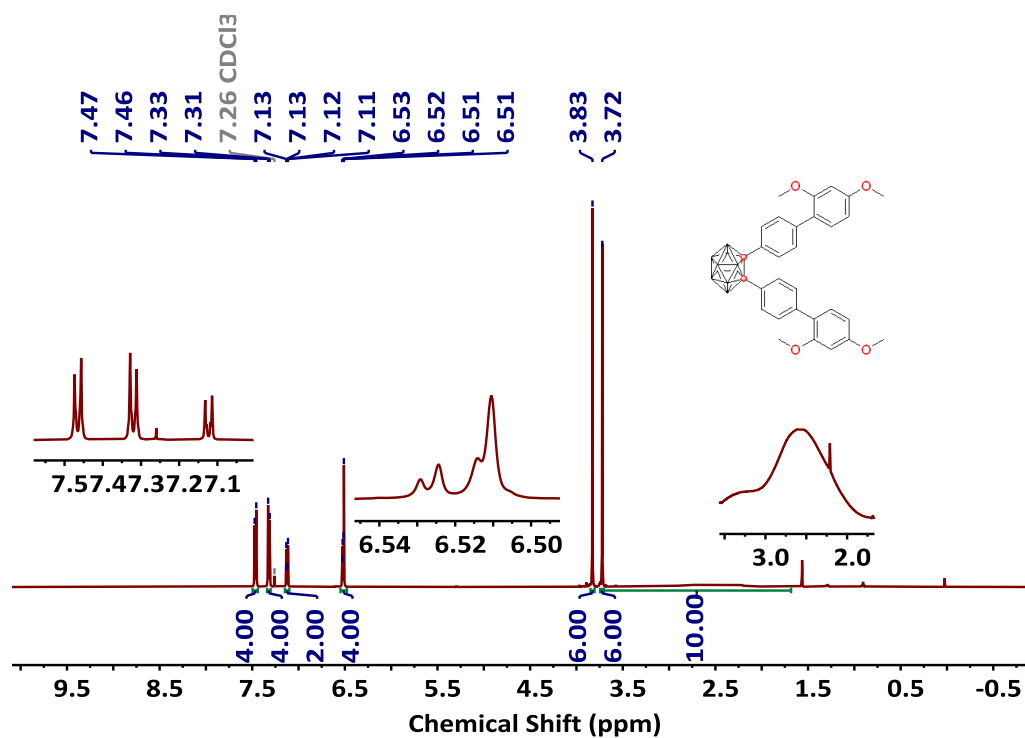

Figure S1. <sup>1</sup>H NMR spectrum of **2a** (500 MHz, CDCl<sub>3</sub>).

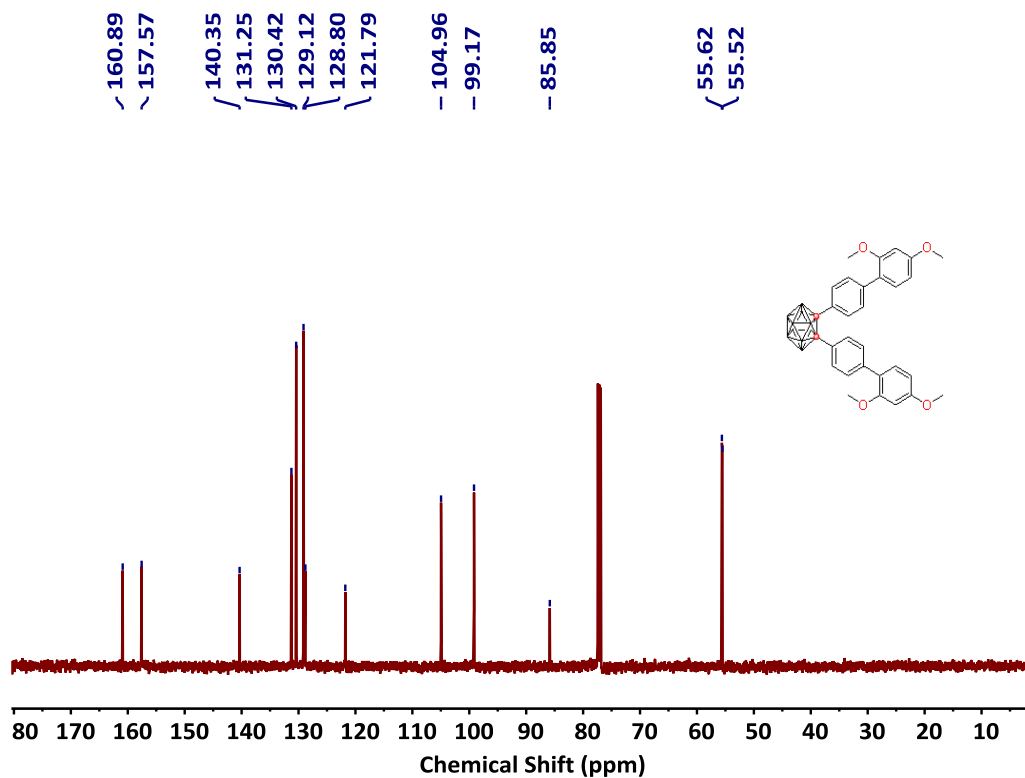

Figure S2. <sup>13</sup>C NMR spectrum of **2a** (126 MHz, CDCl<sub>3</sub>).

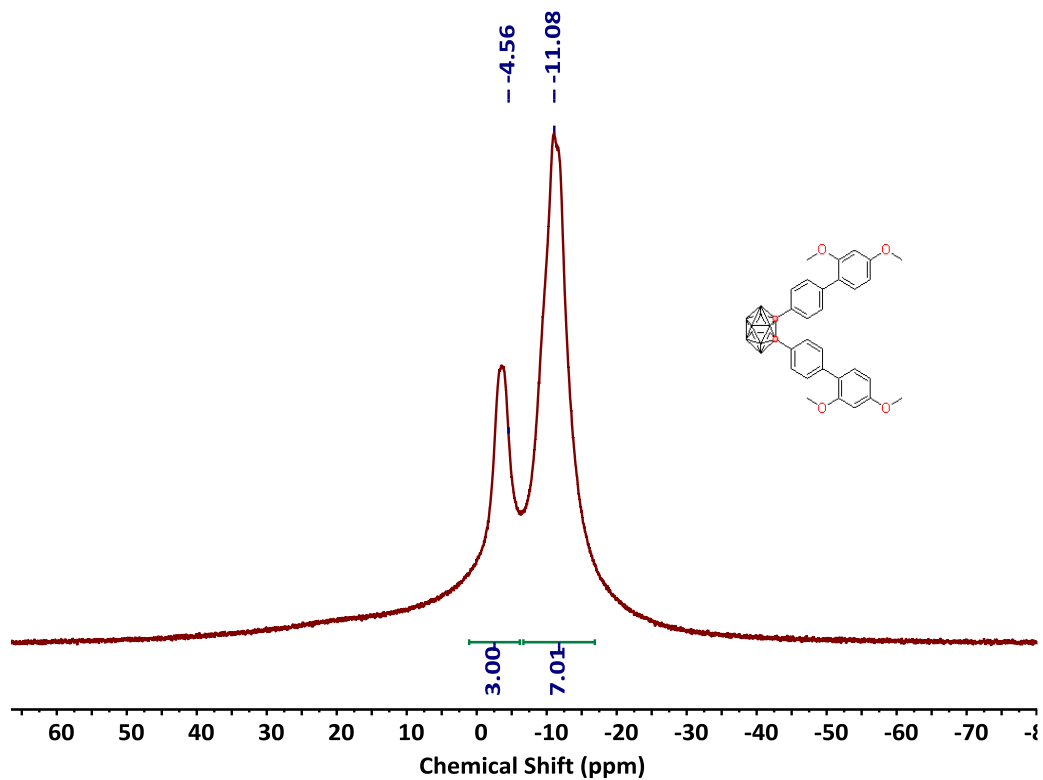

Figure S3.  $^{11}\text{B}$  NMR spectrum of **2a** (160 MHz,  $\text{CDCl}_3$ ).

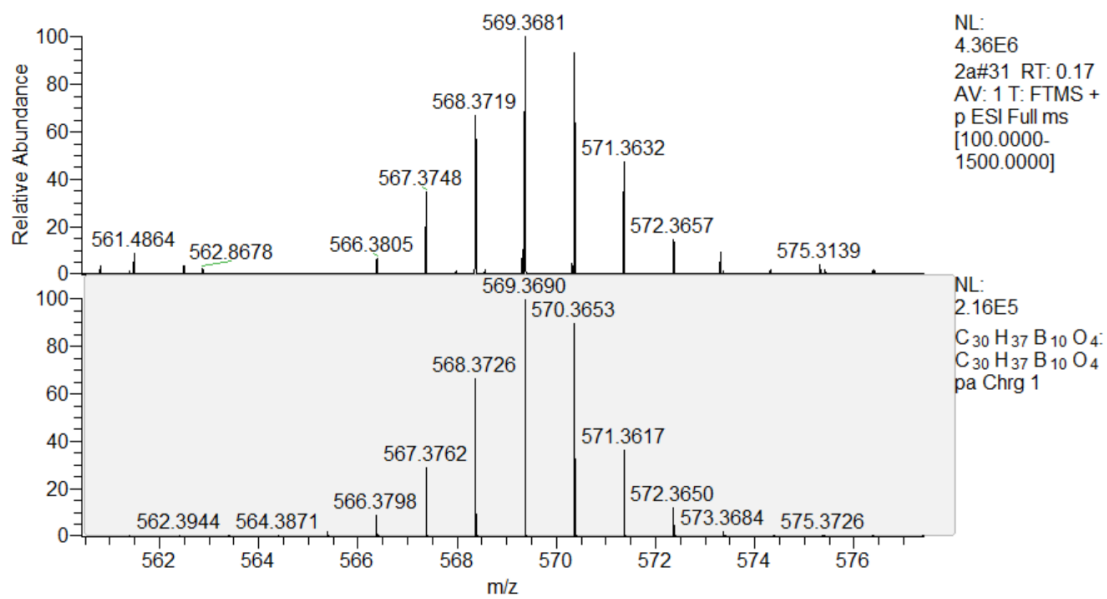

Figure S4. HR-MS (ESI) spectra of **2a**.

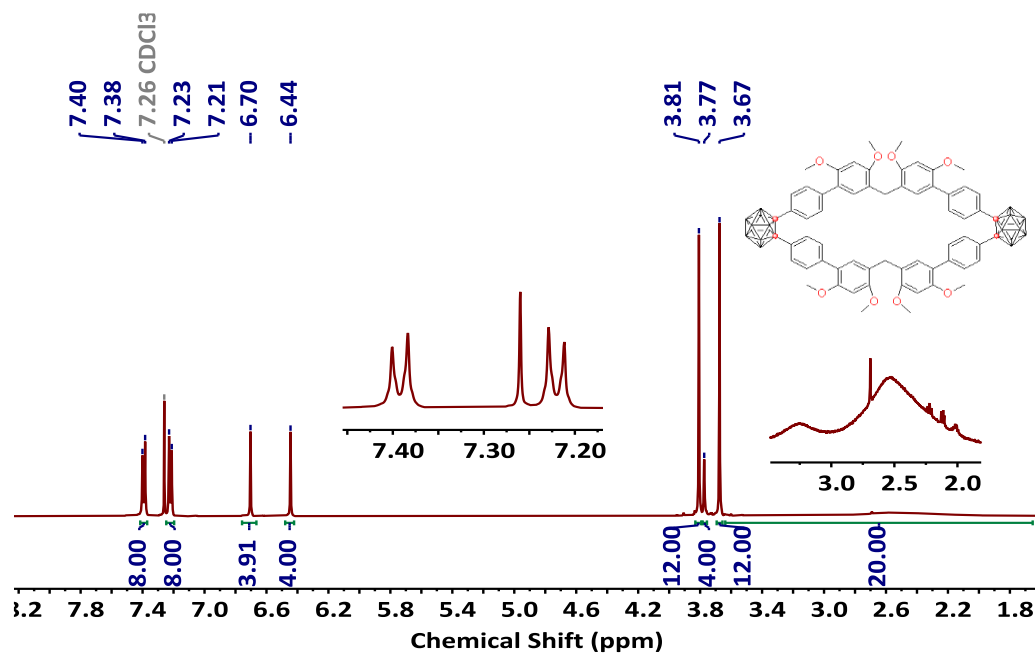

Figure S5.  $^1\text{H}$  NMR spectrum of **3a** (500 MHz,  $\text{CDCl}_3$ ).

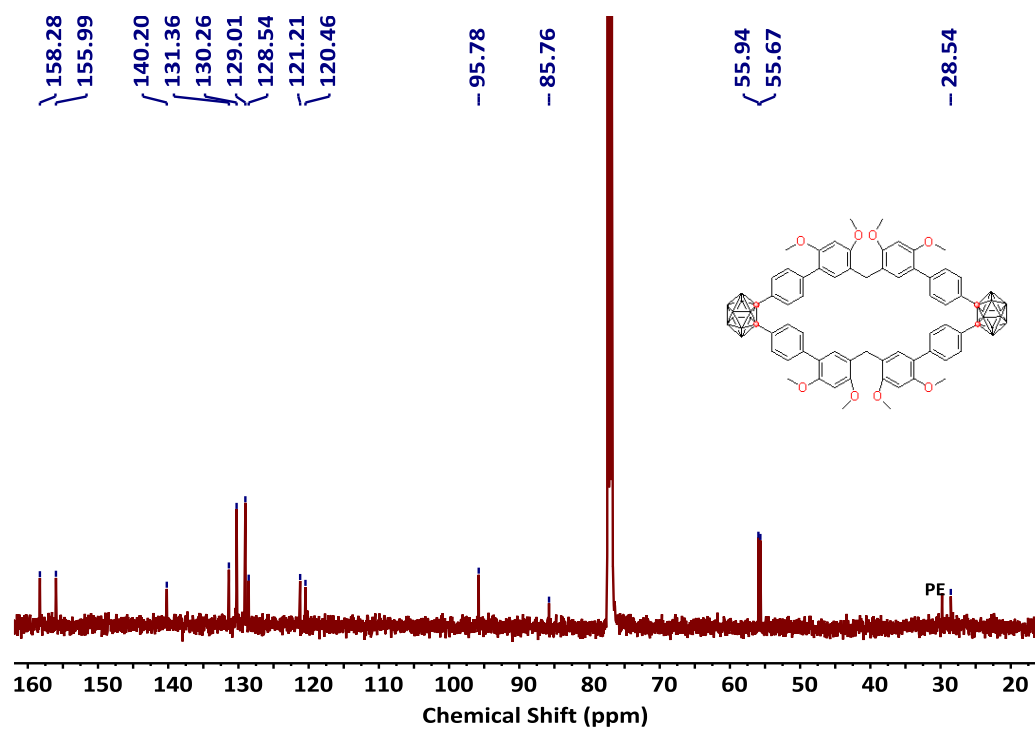

Figure S6.  $^{13}\text{C}$  NMR spectrum of **3a** (126 MHz,  $\text{CDCl}_3$ ).

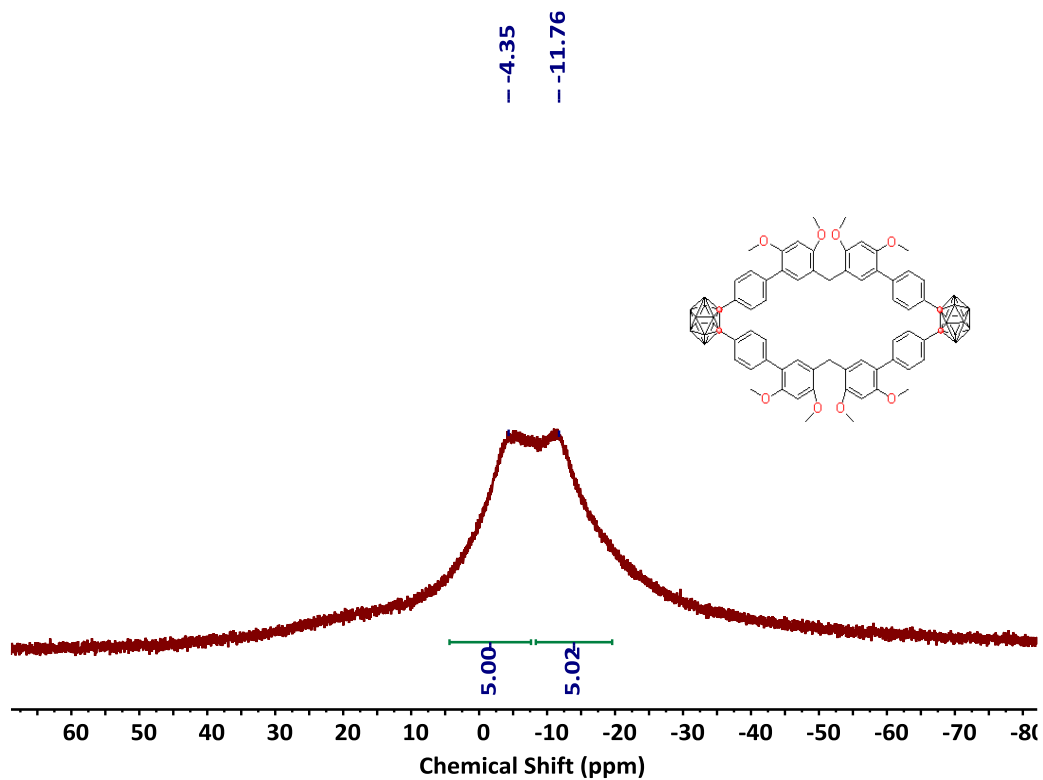

Figure S7.  $^{11}\text{B}$  NMR spectrum of **3a** (160 MHz,  $\text{CDCl}_3$ ).

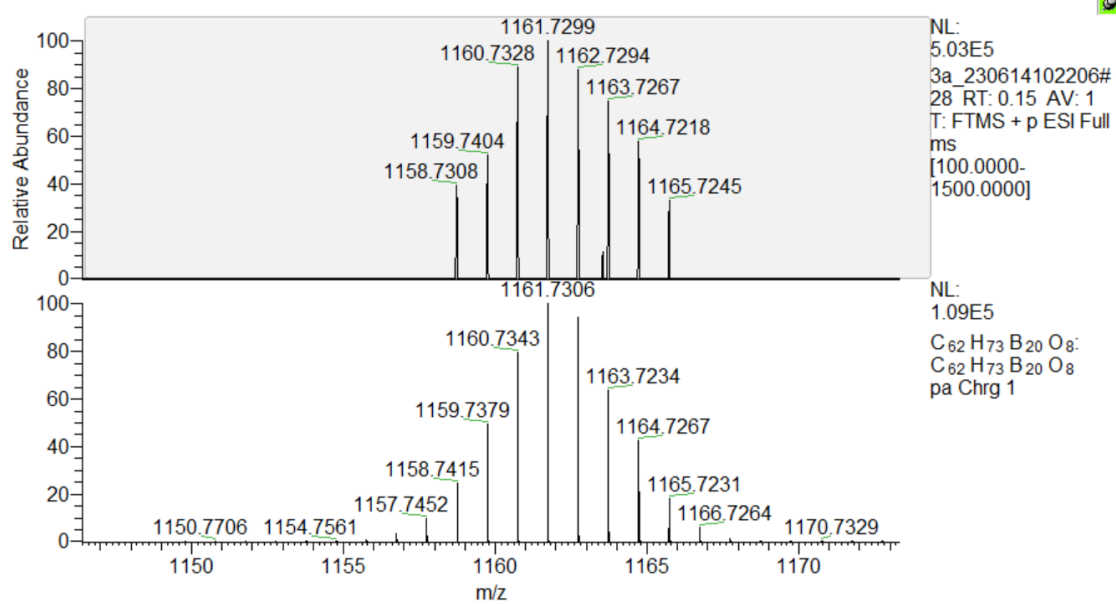

Figure S8. HR-MS (ESI) spectra of **3a**.

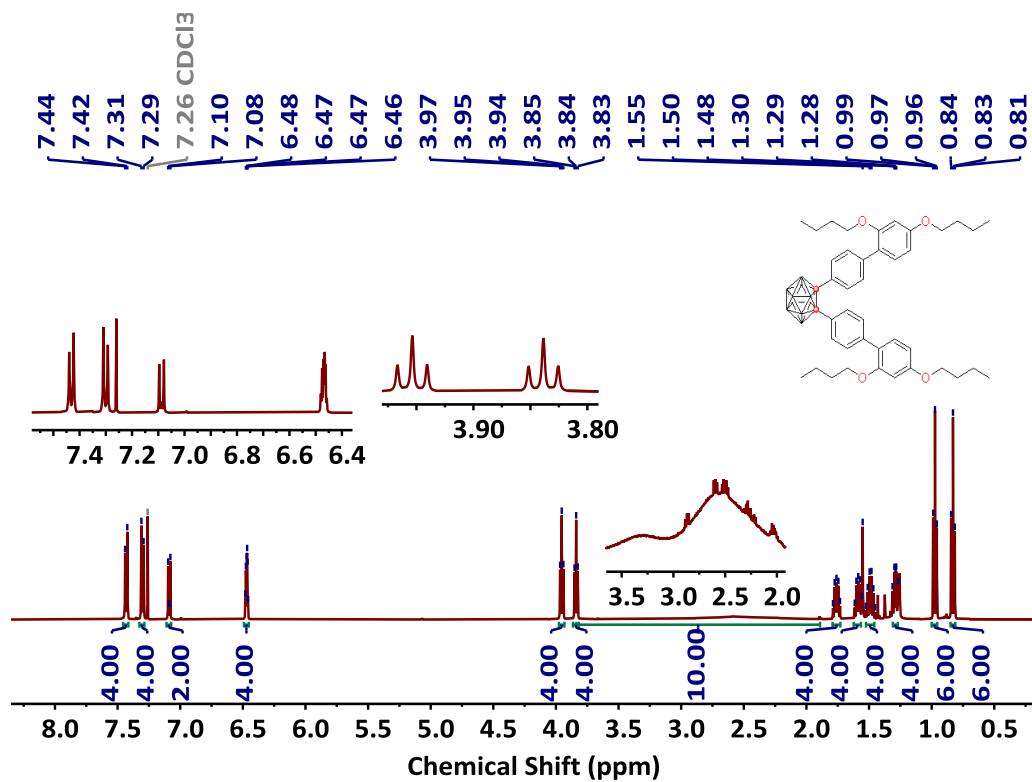

Figure S9. <sup>1</sup>H NMR spectrum of **2b** (500 MHz, CDCl<sub>3</sub>).

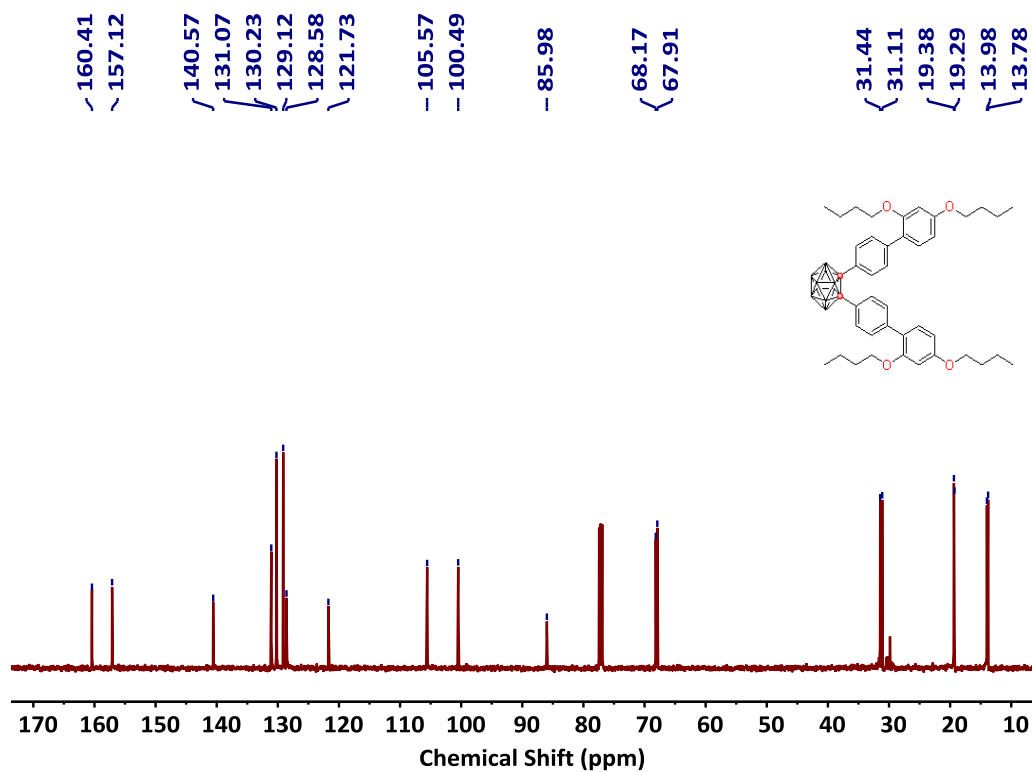

Figure S10. <sup>13</sup>C NMR spectrum of **2b** (126 MHz, CDCl<sub>3</sub>).

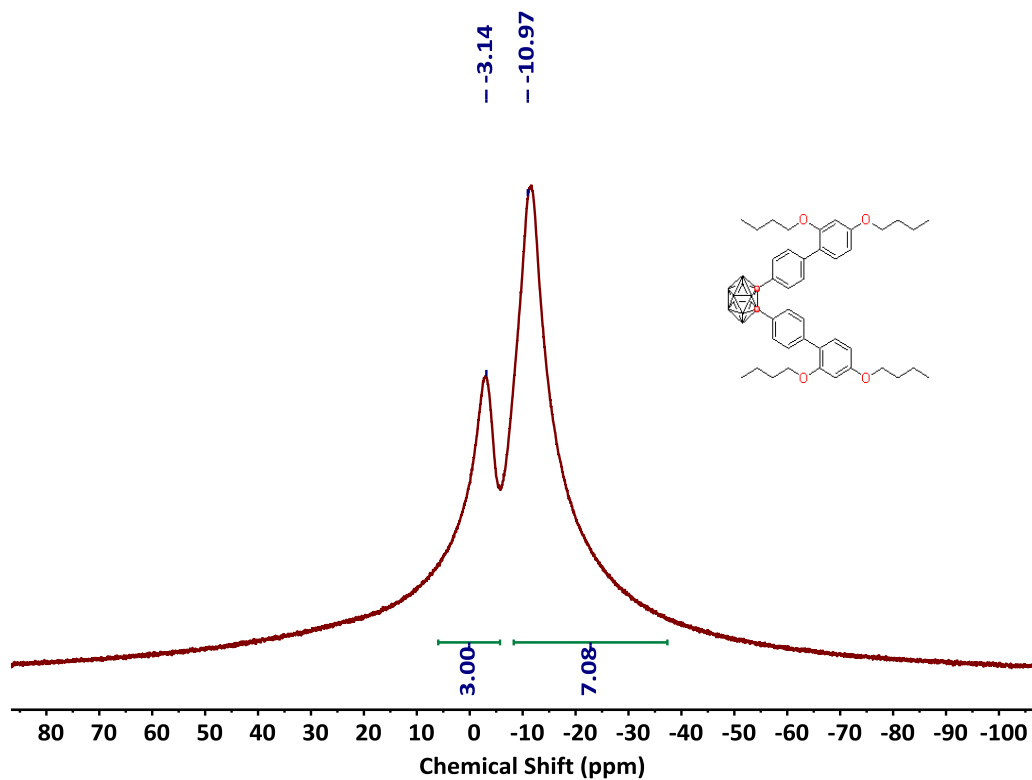

**Figure S11.** <sup>11</sup>B NMR spectrum of **2b** (160 MHz, CDCl<sub>3</sub>).

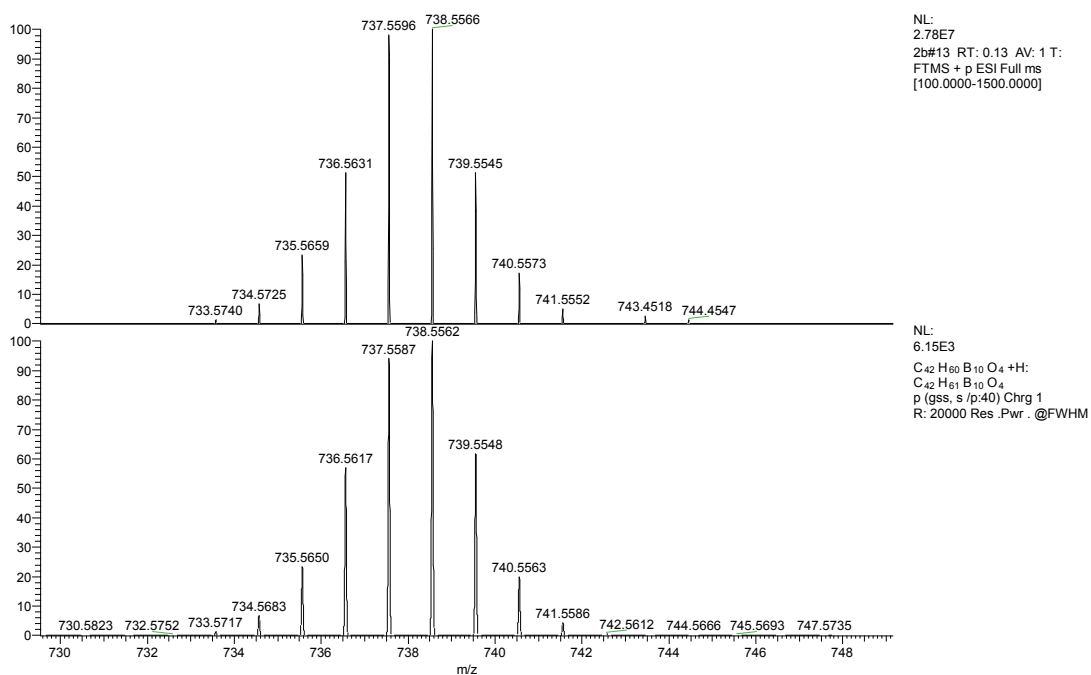

**Figure S12.** HR-MS (ESI) spectrum of **2b**.

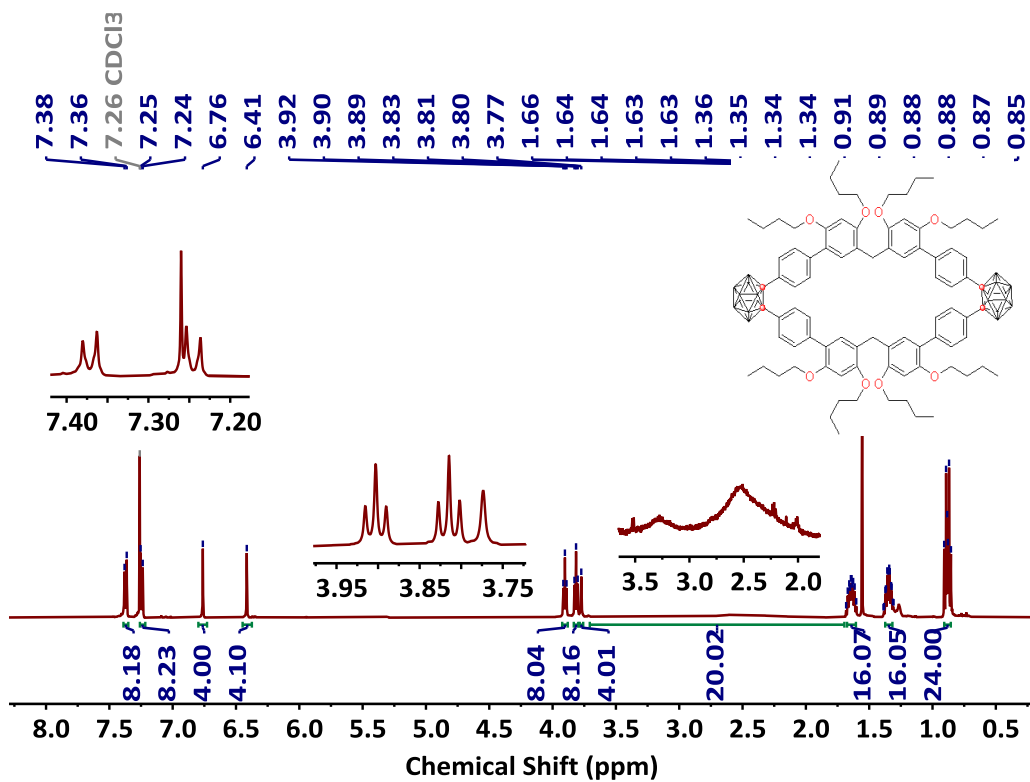

Figure S13.  $^1\text{H}$  NMR spectrum of **3b** (500 MHz,  $\text{CDCl}_3$ ).

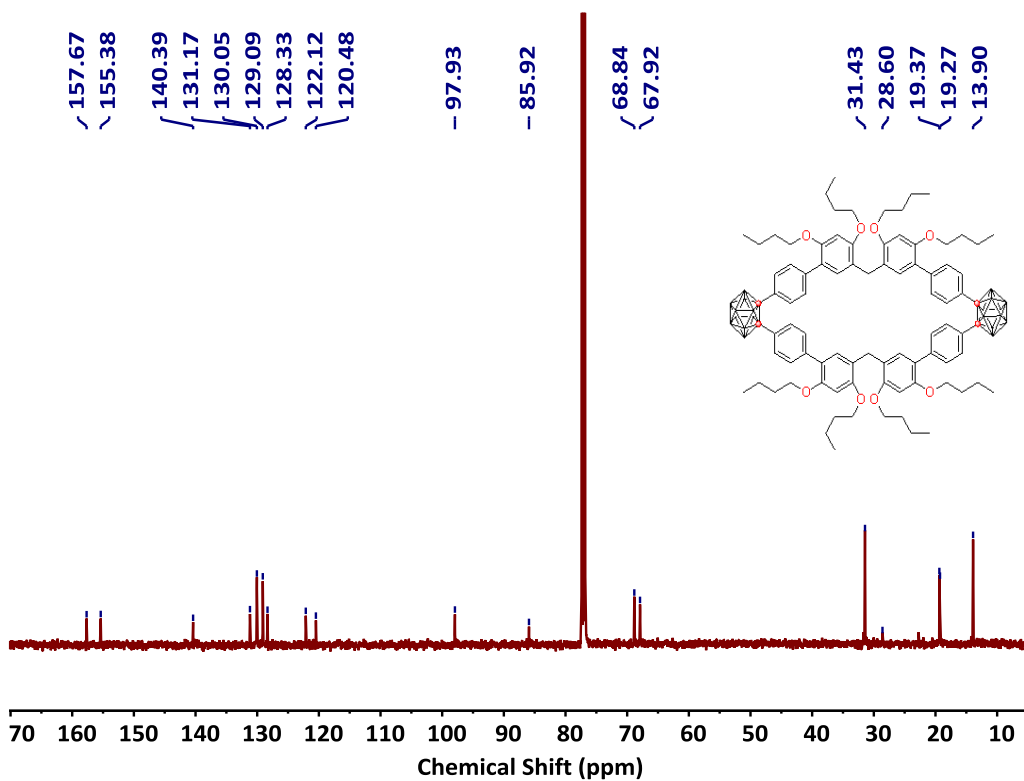

Figure S14.  $^{13}\text{C}$  NMR spectrum of **3b** (126 MHz,  $\text{CDCl}_3$ ).



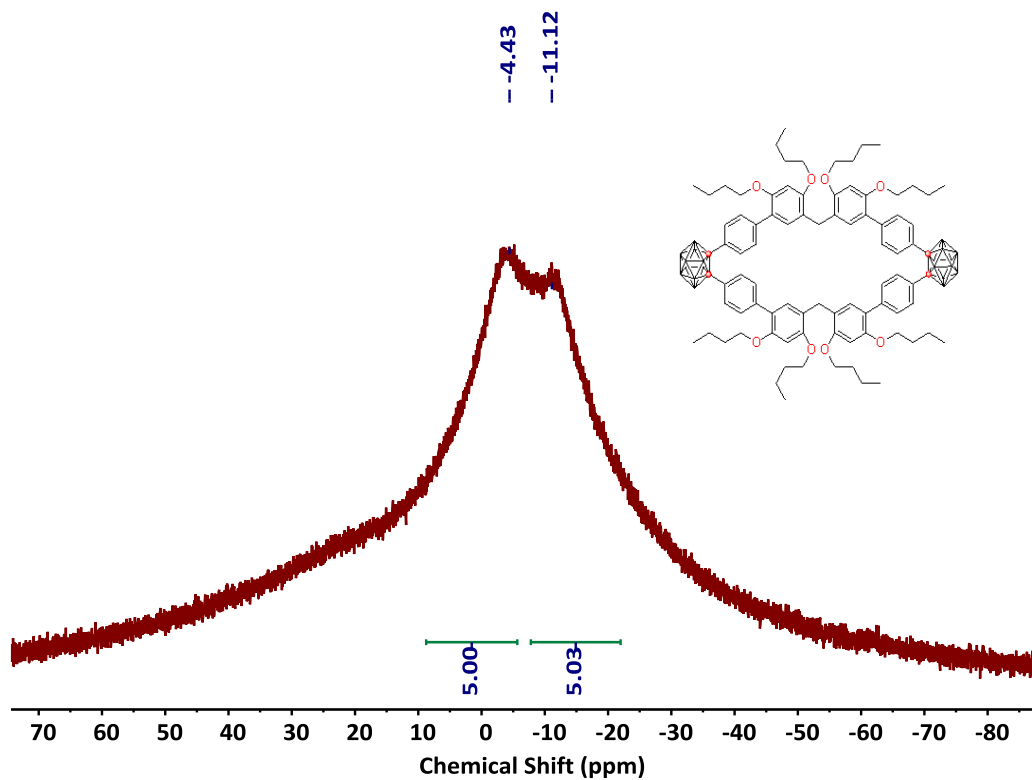

**Figure S15.**  $^{11}\text{B}$  NMR spectrum of **3b** (160 MHz,  $\text{CDCl}_3$ ).

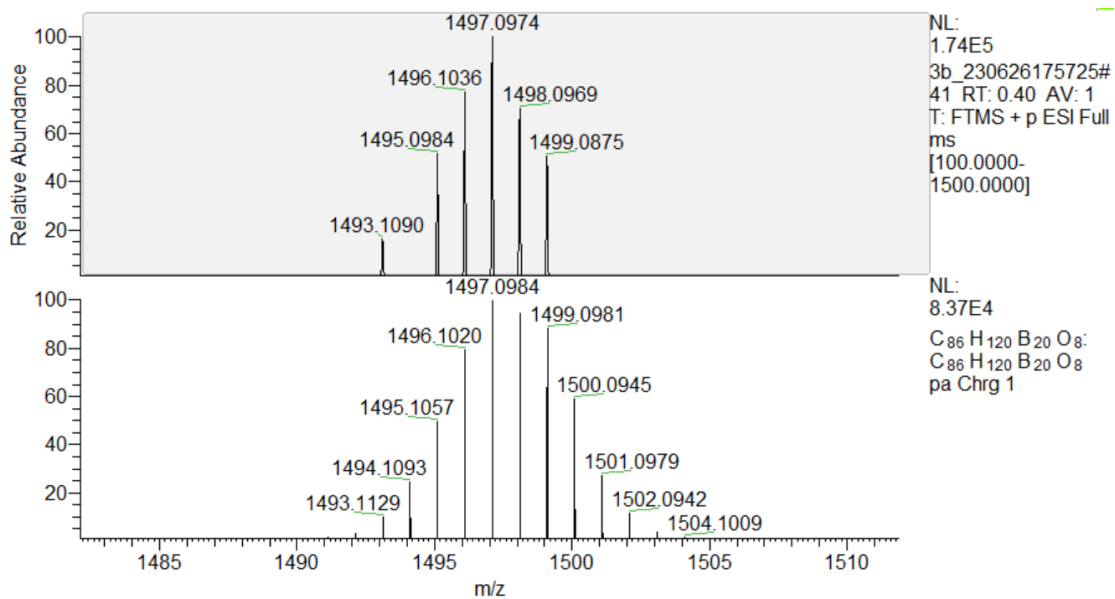

**Figure S16.** HR-MS (ESI) spectrum of **3b**.

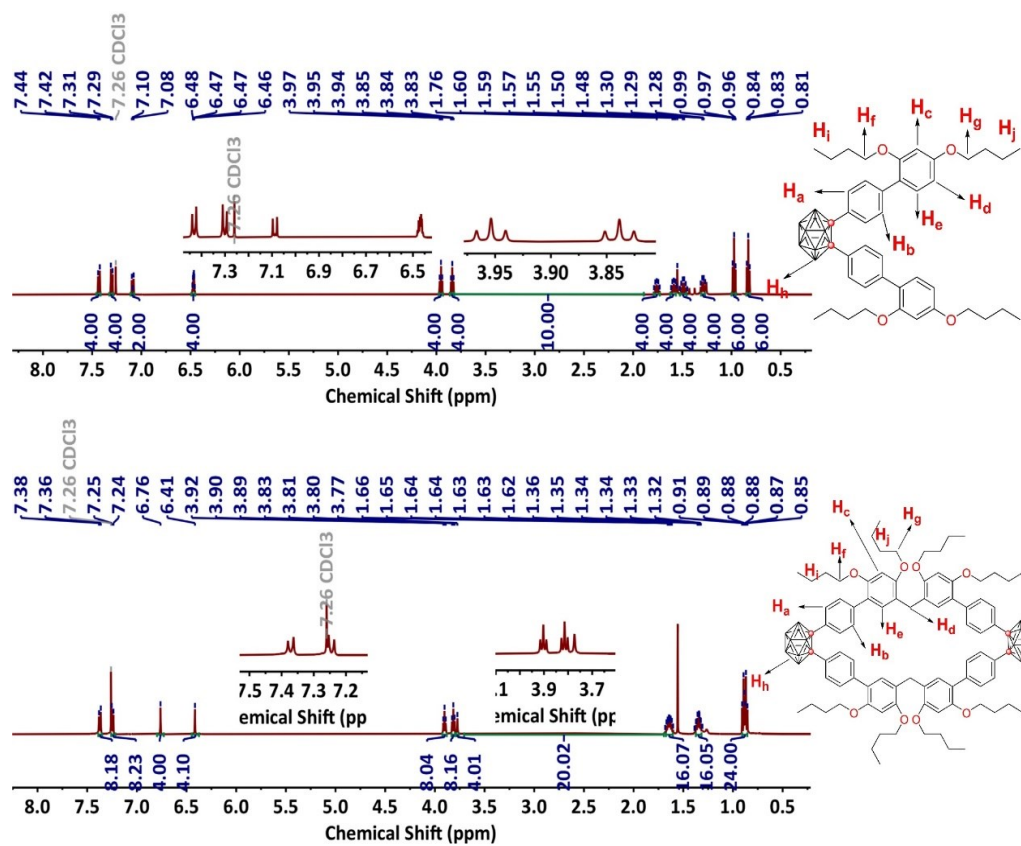

Figure S17.  $^1\text{H-NMR}$  spectra of **2b** and **3b** in  $\text{CDCl}_3$ .

## 2. Crystal Data and DFT Calculations

Table S1. Crystal data and structure refinement for **3a** and **3b**.

| Compound                                | <b>3a</b>                                                      | <b>3b</b>                                                       |
|-----------------------------------------|----------------------------------------------------------------|-----------------------------------------------------------------|
| <b>Empirical formula</b>                | C <sub>62</sub> H <sub>72</sub> B <sub>20</sub> O <sub>8</sub> | C <sub>86</sub> H <sub>120</sub> B <sub>20</sub> O <sub>8</sub> |
| <b>Formula weight</b>                   | 1161.40                                                        | 1498.02                                                         |
| <b>Temperature/K</b>                    | 293(2)                                                         | 293(2)                                                          |
| <b>Crystal system</b>                   | monoclinic                                                     | monoclinic                                                      |
| <b>Space group</b>                      | P2 <sub>1</sub> /c                                             | C2/c                                                            |
| <b>a/Å</b>                              | 19.3942(2)                                                     | 35.4352(3)                                                      |
| <b>b/Å</b>                              | 13.13040(10)                                                   | 16.80310(10)                                                    |
| <b>c/Å</b>                              | 33.0142(3)                                                     | 17.1648(2)                                                      |
| <b>α/°</b>                              | 90                                                             | 90                                                              |
| <b>β/°</b>                              | 96.0910(10)                                                    | 103.8970(10)                                                    |
| <b>γ/°</b>                              | 90                                                             | 90                                                              |
| <b>Volume/Å<sup>3</sup></b>             | 8359.72(13)                                                    | 9914.43(16)                                                     |
| <b>Z</b>                                | 117                                                            | 138                                                             |
| <b>ρ<sub>calc</sub>/cm<sup>3</sup></b>  | 1.749                                                          | 1.740                                                           |
| <b>μ/mm<sup>-1</sup></b>                | 9.344                                                          | 9.292                                                           |
| <b>F(000)</b>                           | 4329.0                                                         | 5106.0                                                          |
| <b>Crystal size/mm<sup>3</sup></b>      | 0.12 × 0.11 × 0.1                                              | 0.12 × 0.11 × 0.1                                               |
| <b>Radiation</b>                        | CuKα (λ = 1.54184)                                             | CuKα (λ = 1.54184)                                              |
| <b>2θ range for data collection/°</b>   | 4.582 to 153.78                                                | 5.854 to 151.948                                                |
| <b>Reflections collected</b>            | 58489                                                          | 48778                                                           |
| <b>Data/restraints/parameters</b>       | 16746/0/819                                                    | 10095/152/556                                                   |
| <b>Goodness-of-fit on F<sup>2</sup></b> | 1.066                                                          | 1.044                                                           |
| <b>Final R indexes [I ≥ 2σ (I)]</b>     | R <sub>1</sub> = 0.0732,<br>wR <sub>2</sub> = 0.2255           | R <sub>1</sub> = 0.0597,<br>wR <sub>2</sub> = 0.1706            |
| <b>Final R indexes [all data]</b>       | R <sub>1</sub> = 0.0899,<br>wR <sub>2</sub> = 0.2367           | R <sub>1</sub> = 0.0654,<br>wR <sub>2</sub> = 0.1756            |
| <b>CCDC number</b>                      | 2284988                                                        | 2284986                                                         |

## DFT Calculations

Density functional theory (DFT) calculations were performed using Gaussian 16(Revision C.01). Calculations were carried out using the generalized B3LYP and 6-31G(d) basis groups with a single crystal as the starting geometrical configuration. Each structure was optimized to meet standard convergence criteria, and the existence of a local minimum was verified by a normal mode frequency calculation. Negative frequencies were not observed.

**Table S2.** Atomic coordinates of **3a** after geometry optimization.

| Atom | X(Å)        | Y(Å)        | Z(Å)        |
|------|-------------|-------------|-------------|
| O    | 7.46700000  | 8.71700000  | 21.85600000 |
| O    | 11.53800000 | 1.59000000  | 16.92100000 |
| O    | 8.66600000  | 11.96100000 | 18.44600000 |
| O    | 14.51400000 | 2.42000000  | 20.64600000 |
| O    | 8.80300000  | 6.23400000  | 13.77000000 |
| O    | 16.63700000 | 10.48900000 | 19.31300000 |
| O    | 6.94400000  | 3.37400000  | 17.22900000 |
| O    | 12.95200000 | 12.62500000 | 21.64500000 |
| C    | 8.34300000  | 9.55200000  | 21.20800000 |
| C    | 12.42600000 | 4.59800000  | 24.74100000 |
| C    | 11.84100000 | 2.09500000  | 18.16100000 |
| C    | 9.63600000  | 9.60400000  | 21.74200000 |
| C    | 8.94500000  | 11.17300000 | 19.51000000 |
| C    | 12.40300000 | 3.49600000  | 22.14200000 |
| C    | 10.19400000 | 5.17200000  | 15.35100000 |
| C    | 7.99600000  | 10.30800000 | 20.10800000 |
| H    | 7.11900000  | 10.24800000 | 19.75000000 |
| C    | 10.31000000 | 4.36000000  | 16.46000000 |
| H    | 11.17900000 | 4.21500000  | 16.81800000 |
| C    | 13.31500000 | 2.48600000  | 20.01500000 |
| C    | 8.90200000  | 5.43000000  | 14.88300000 |
| C    | 10.24500000 | 11.24400000 | 20.03400000 |
| C    | 10.77400000 | 2.65900000  | 18.85000000 |
| C    | 9.23700000  | 3.74500000  | 17.08100000 |
| C    | 12.40500000 | 5.18500000  | 26.10300000 |
| C    | 13.10600000 | 2.01100000  | 18.72200000 |
| H    | 13.82600000 | 1.63500000  | 18.22900000 |
| C    | 10.18300000 | 6.86700000  | 24.31500000 |
| H    | 9.87600000  | 5.98500000  | 24.48700000 |
| C    | 7.78400000  | 4.84800000  | 15.50900000 |
| H    | 6.90800000  | 5.03800000  | 15.19500000 |
| C    | 11.46700000 | 3.64300000  | 24.38300000 |
| H    | 10.83000000 | 3.35100000  | 25.02200000 |
| C    | 10.55500000 | 10.46700000 | 21.12200000 |

|   |             |             |             |
|---|-------------|-------------|-------------|
| H | 11.43500000 | 10.51700000 | 21.47700000 |
| C | 11.41700000 | 5.63700000  | 14.65500000 |
| C | 11.10500000 | 7.44600000  | 25.18100000 |
| C | 15.71600000 | 8.66200000  | 14.67400000 |
| C | 12.67700000 | 11.77800000 | 19.47600000 |
| C | 11.44500000 | 3.12500000  | 23.11100000 |
| H | 10.76600000 | 2.50100000  | 22.87800000 |
| C | 7.96500000  | 4.00500000  | 16.57700000 |
| C | 14.53400000 | 10.67900000 | 18.30400000 |
| C | 10.09000000 | 8.86900000  | 22.95500000 |
| C | 11.65600000 | 6.73200000  | 26.38000000 |
| C | 9.70100000  | 7.53800000  | 23.21100000 |
| H | 9.10200000  | 7.10000000  | 22.61700000 |
| C | 9.40600000  | 2.75700000  | 18.24500000 |
| H | 8.77100000  | 3.01300000  | 18.95800000 |
| H | 9.14500000  | 1.85800000  | 17.92600000 |
| C | 11.51600000 | 8.76000000  | 24.91400000 |
| H | 12.15600000 | 9.17600000  | 25.48100000 |
| C | 6.14100000  | 8.60900000  | 21.32400000 |
| H | 6.18600000  | 8.27000000  | 20.40500000 |
| H | 5.71600000  | 9.49100000  | 21.32400000 |
| H | 5.61700000  | 7.99300000  | 21.87400000 |
| C | 11.01400000 | 3.11600000  | 20.13100000 |
| H | 10.29800000 | 3.51700000  | 20.61000000 |
| C | 13.82400000 | 6.43400000  | 13.40300000 |
| C | 13.22600000 | 11.13200000 | 18.37800000 |
| H | 12.66600000 | 10.99000000 | 17.62300000 |
| C | 15.34500000 | 10.89900000 | 19.40800000 |
| C | 13.52600000 | 11.98900000 | 20.56100000 |
| C | 11.56900000 | 6.92300000  | 14.12000000 |
| H | 10.85100000 | 7.54100000  | 14.18500000 |
| C | 13.41300000 | 4.92100000  | 23.81500000 |
| H | 14.10400000 | 5.52400000  | 24.06400000 |
| C | 12.26400000 | 3.01700000  | 20.75700000 |
| C | 15.00300000 | 9.98700000  | 17.07200000 |
| C | 7.32300000  | 12.02000000 | 17.97800000 |
| H | 7.25300000  | 12.70200000 | 17.27700000 |
| H | 6.72700000  | 12.25100000 | 18.72100000 |
| H | 7.06700000  | 11.14900000 | 17.61300000 |
| C | 13.69300000 | 5.15100000  | 13.92900000 |
| H | 14.41800000 | 4.53900000  | 13.86900000 |
| C | 11.00900000 | 9.44700000  | 23.85500000 |
| H | 11.28400000 | 10.34600000 | 23.71800000 |

|   |             |             |             |
|---|-------------|-------------|-------------|
| C | 14.99400000 | 9.86300000  | 14.63500000 |
| H | 14.73600000 | 10.23200000 | 13.79800000 |
| C | 14.85000000 | 11.56900000 | 20.55200000 |
| H | 15.41400000 | 11.72800000 | 21.29800000 |
| C | 12.74500000 | 7.31000000  | 13.50400000 |
| H | 12.81800000 | 8.18600000  | 13.14600000 |
| C | 13.41200000 | 4.38400000  | 22.54800000 |
| H | 14.10300000 | 4.61700000  | 21.93900000 |
| C | 14.65800000 | 10.51000000 | 15.80900000 |
| H | 14.17900000 | 11.33100000 | 15.76200000 |
| C | 15.76800000 | 8.82700000  | 17.08800000 |
| H | 16.07100000 | 8.47900000  | 17.91900000 |
| C | 12.58300000 | 0.99200000  | 16.16400000 |
| H | 12.19900000 | 0.50100000  | 15.41000000 |
| H | 13.08800000 | 0.37500000  | 16.73300000 |
| H | 13.18400000 | 1.69000000  | 15.82700000 |
| C | 11.23800000 | 12.25000000 | 19.46000000 |
| H | 10.98200000 | 12.45300000 | 18.52800000 |
| H | 11.17500000 | 13.09000000 | 19.98100000 |
| C | 16.09900000 | 8.16700000  | 15.90900000 |
| H | 16.59800000 | 7.36000000  | 15.95100000 |
| C | 12.50900000 | 4.76700000  | 14.53700000 |
| H | 12.43600000 | 3.88600000  | 14.88600000 |
| C | 7.48500000  | 6.49700000  | 13.24400000 |
| H | 7.54900000  | 7.14200000  | 12.51100000 |
| H | 6.91600000  | 6.86400000  | 13.95400000 |
| H | 7.09300000  | 5.66200000  | 12.91100000 |
| C | 15.10000000 | 6.79600000  | 12.67400000 |
| C | 16.12100000 | 7.99300000  | 13.39700000 |
| C | 15.65300000 | 2.00700000  | 19.88000000 |
| H | 15.75400000 | 2.59400000  | 19.10200000 |
| H | 15.52700000 | 1.08300000  | 19.57700000 |
| H | 16.45900000 | 2.06200000  | 20.43700000 |
| C | 17.53100000 | 10.80900000 | 20.34600000 |
| H | 18.43400000 | 10.52500000 | 20.09500000 |
| H | 17.26000000 | 10.34800000 | 21.16700000 |
| H | 17.52400000 | 11.77700000 | 20.49600000 |
| C | 5.72800000  | 3.22000000  | 16.50800000 |
| H | 5.91700000  | 2.84200000  | 15.62500000 |
| H | 5.29600000  | 4.09400000  | 16.40400000 |
| H | 5.13000000  | 2.61700000  | 17.00000000 |
| B | 12.18300000 | 4.19900000  | 27.50100000 |
| H | 12.08900000 | 3.08300000  | 27.46800000 |

|   |             |             |             |
|---|-------------|-------------|-------------|
| B | 10.88700000 | 5.29100000  | 26.91800000 |
| H | 9.93600000  | 4.91000000  | 26.46500000 |
| B | 13.37600000 | 6.58200000  | 26.44200000 |
| H | 14.05900000 | 7.05200000  | 25.68900000 |
| B | 13.02000000 | 5.00000000  | 28.82000000 |
| H | 13.47800000 | 4.42700000  | 29.66400000 |
| B | 10.92900000 | 6.75800000  | 27.94700000 |
| H | 10.00600000 | 7.33900000  | 28.20800000 |
| C | 13.76000000 | 12.89100000 | 22.78300000 |
| H | 14.52300000 | 13.44500000 | 22.51900000 |
| H | 14.08400000 | 12.04500000 | 23.15800000 |
| H | 13.22900000 | 13.36400000 | 23.45800000 |
| B | 13.72900000 | 5.00100000  | 27.17500000 |
| H | 14.65600000 | 4.42700000  | 26.91400000 |
| B | 11.24700000 | 5.16700000  | 28.64100000 |
| H | 10.52500000 | 4.68800000  | 29.35100000 |
| B | 12.46700000 | 7.54600000  | 27.62100000 |
| H | 12.56400000 | 8.66000000  | 27.65700000 |
| B | 12.24700000 | 6.57300000  | 29.08400000 |
| H | 12.20500000 | 7.03600000  | 30.10400000 |
| B | 13.77500000 | 6.47000000  | 28.16200000 |
| H | 14.74100000 | 6.86400000  | 28.56900000 |
| B | 16.56900000 | 6.32400000  | 13.42600000 |
| H | 16.58900000 | 5.71700000  | 14.36800000 |
| B | 15.22100000 | 8.34600000  | 11.95400000 |
| H | 14.36900000 | 9.07100000  | 11.92100000 |
| B | 16.06100000 | 5.60700000  | 11.89500000 |
| H | 15.77800000 | 4.52700000  | 11.80700000 |
| B | 16.90600000 | 8.87100000  | 12.18800000 |
| H | 17.17300000 | 9.95300000  | 12.29200000 |
| B | 17.77300000 | 7.59500000  | 13.11700000 |
| H | 18.61000000 | 7.82000000  | 13.82700000 |
| B | 16.38700000 | 8.16500000  | 10.63100000 |
| H | 16.32400000 | 8.78400000  | 9.69900000  |
| B | 15.22000000 | 6.86700000  | 10.95700000 |
| H | 14.38300000 | 6.62600000  | 10.25000000 |
| B | 17.75100000 | 6.12800000  | 12.14900000 |
| H | 18.59100000 | 5.39200000  | 12.23100000 |
| B | 16.90700000 | 6.45700000  | 10.60500000 |
| H | 17.19200000 | 5.93300000  | 9.65700000  |
| B | 17.95300000 | 7.70600000  | 11.32800000 |
| H | 18.91600000 | 8.01800000  | 10.84900000 |

**Table S3.** Atomic coordinates of **3b** after geometry optimization.

|   |             |             |             |
|---|-------------|-------------|-------------|
| O | 6.55060000  | 12.10810000 | 11.60270000 |
| O | 11.34530000 | 8.72390000  | 9.31870000  |
| O | 8.38960000  | 10.37030000 | 7.47720000  |
| O | 15.95950000 | 9.74010000  | 10.35680000 |
| C | 9.91700000  | 12.02170000 | 10.27580000 |
| H | 10.76520000 | 12.31120000 | 10.52070000 |
| C | 8.85960000  | 12.27390000 | 11.15700000 |
| C | 9.08090000  | 13.05190000 | 12.39510000 |
| C | 9.49700000  | 14.66350000 | 14.68860000 |
| C | 9.77920000  | 11.37440000 | 9.07390000  |
| C | 15.69520000 | 12.31310000 | 9.20320000  |
| C | 14.60380000 | 11.31030000 | 9.26700000  |
| C | 7.59450000  | 11.82840000 | 10.75690000 |
| C | 18.72960000 | 15.38390000 | 8.82380000  |
| C | 17.69640000 | 14.28810000 | 9.01350000  |
| C | 8.48820000  | 10.95980000 | 8.70140000  |
| C | 13.34560000 | 11.64210000 | 8.73420000  |
| H | 13.23880000 | 12.47820000 | 8.34100000  |
| C | 12.25700000 | 10.79110000 | 8.76350000  |
| C | 10.94260000 | 11.16430000 | 8.12720000  |
| H | 10.70030000 | 10.46560000 | 7.49780000  |
| H | 11.07140000 | 11.97890000 | 7.61850000  |
| C | 7.41350000  | 11.16260000 | 9.55500000  |
| H | 6.56800000  | 10.85240000 | 9.32050000  |
| C | 12.44570000 | 9.54190000  | 9.33770000  |
| C | 9.61180000  | 15.58570000 | 15.86980000 |
| C | 8.69200000  | 13.53310000 | 14.73860000 |
| H | 8.28640000  | 13.29620000 | 15.54220000 |
| C | 10.11010000 | 14.95270000 | 13.48320000 |
| H | 10.67330000 | 15.69070000 | 13.42290000 |
| C | 8.48240000  | 12.75600000 | 13.61770000 |
| H | 7.92450000  | 12.01470000 | 13.68150000 |
| C | 9.90430000  | 14.17050000 | 12.37440000 |
| H | 10.33190000 | 14.39890000 | 11.58120000 |
| C | 15.42120000 | 13.65580000 | 9.39460000  |
| H | 14.54740000 | 13.91660000 | 9.58260000  |
| C | 17.98620000 | 12.94860000 | 8.81870000  |
| H | 18.85840000 | 12.69640000 | 8.61860000  |
| C | 16.40600000 | 14.61530000 | 9.31360000  |
| H | 16.18710000 | 15.50660000 | 9.46880000  |
| C | 14.73040000 | 10.05650000 | 9.84120000  |
| C | 17.01630000 | 11.99250000 | 8.91350000  |



|   |             |             |             |
|---|-------------|-------------|-------------|
| H | 17.24690000 | 11.10120000 | 8.78070000  |
| C | 13.65790000 | 9.18230000  | 9.87230000  |
| H | 13.76020000 | 8.34210000  | 10.26030000 |
| C | 7.09070000  | 9.93550000  | 7.02180000  |
| H | 6.47820000  | 10.68710000 | 6.99080000  |
| H | 6.72880000  | 9.26750000  | 7.62710000  |
| C | 5.21530000  | 11.81020000 | 11.15520000 |
| H | 5.10520000  | 10.85240000 | 11.05870000 |
| H | 5.05420000  | 12.22600000 | 10.29300000 |
| B | 18.67400000 | 16.68760000 | 9.94300000  |
| H | 17.92390000 | 16.75750000 | 10.74480000 |
| C | 11.46330000 | 7.37580000  | 9.79120000  |
| H | 11.75230000 | 7.36730000  | 10.71720000 |
| H | 12.11210000 | 6.88840000  | 9.26010000  |
| B | 20.33850000 | 14.97150000 | 8.40650000  |
| H | 20.66690000 | 13.93870000 | 8.22370000  |
| C | 16.17240000 | 8.44950000  | 10.97590000 |
| H | 15.96800000 | 7.73880000  | 10.34820000 |
| H | 15.59540000 | 8.35060000  | 11.75020000 |
| B | 9.24030000  | 17.25340000 | 15.71630000 |
| H | 8.88400000  | 17.71020000 | 14.78170000 |
| B | 19.28830000 | 15.83550000 | 7.28220000  |
| H | 18.94530000 | 15.36170000 | 6.34930000  |
| B | 18.25110000 | 16.89550000 | 8.21860000  |
| H | 17.22480000 | 17.12900000 | 7.89610000  |
| B | 8.21880000  | 16.20360000 | 16.66300000 |
| H | 7.19070000  | 15.96840000 | 16.34920000 |
| B | 19.27530000 | 18.10720000 | 9.05150000  |
| H | 18.91570000 | 19.12290000 | 9.27220000  |
| C | 4.26990000  | 12.32480000 | 12.13820000 |
| H | 4.38480000  | 13.28600000 | 12.21400000 |
| H | 3.36830000  | 12.15610000 | 11.82600000 |
| B | 20.95430000 | 16.38770000 | 7.47880000  |
| H | 21.69630000 | 16.28710000 | 6.67350000  |
| B | 20.93910000 | 17.77320000 | 8.59100000  |
| H | 21.67420000 | 18.58440000 | 8.50650000  |
| B | 19.66210000 | 17.55680000 | 7.38400000  |
| H | 19.56360000 | 18.22310000 | 6.51310000  |
| C | 10.12580000 | 6.75380000  | 9.66540000  |
| H | 10.19950000 | 5.83350000  | 9.96200000  |
| H | 9.53020000  | 7.20540000  | 10.28440000 |
| C | 17.60630000 | 8.37280000  | 11.38980000 |
| H | 17.73000000 | 7.51050000  | 11.81910000 |

|   |             |             |             |
|---|-------------|-------------|-------------|
| H | 18.13200000 | 8.35740000  | 10.57580000 |
| C | 8.32820000  | 8.82440000  | 3.53680000  |
| H | 8.50730000  | 9.55720000  | 2.94190000  |
| H | 7.55780000  | 8.34380000  | 3.22810000  |
| H | 9.08620000  | 8.23640000  | 3.55400000  |
| C | 7.26010000  | 9.36630000  | 5.68540000  |
| H | 7.06000000  | 8.42730000  | 5.82680000  |
| H | 6.49340000  | 9.71740000  | 5.20600000  |
| C | 9.51730000  | 6.74700000  | 8.43410000  |
| H | 10.10340000 | 6.29020000  | 7.80990000  |
| H | 9.43770000  | 7.66550000  | 8.13230000  |
| C | 8.09650000  | 6.07890000  | 8.34790000  |
| H | 7.68840000  | 6.30220000  | 7.50810000  |
| H | 7.54570000  | 6.39930000  | 9.06700000  |
| H | 8.18680000  | 5.12460000  | 8.41520000  |
| C | 4.42940000  | 11.75390000 | 13.38840000 |
| H | 4.33760000  | 10.79280000 | 13.29180000 |
| H | 5.33550000  | 11.92780000 | 13.68500000 |
| C | 18.17890000 | 9.31350000  | 12.21750000 |
| H | 17.65100000 | 9.35610000  | 13.02970000 |
| H | 18.10300000 | 10.17750000 | 11.78290000 |
| C | 19.61880000 | 9.13120000  | 12.61760000 |
| H | 20.18610000 | 9.56570000  | 11.97780000 |
| H | 19.82610000 | 8.19380000  | 12.64510000 |
| H | 19.76300000 | 9.51460000  | 13.48490000 |
| C | 8.08060000  | 9.32880000  | 4.86110000  |
| H | 8.83270000  | 8.96410000  | 5.35260000  |
| H | 8.29300000  | 10.26960000 | 4.75420000  |
| C | 3.58250000  | 12.16120000 | 14.36270000 |
| H | 2.94130000  | 12.77130000 | 13.99360000 |
| H | 4.08090000  | 12.60090000 | 15.05590000 |
| H | 3.12840000  | 11.39950000 | 14.73000000 |
| O | 23.05410000 | 12.10810000 | 14.26350000 |
| O | 18.25950000 | 8.72390000  | 16.54750000 |
| O | 21.21510000 | 10.37030000 | 18.38900000 |
| O | 13.64520000 | 9.74010000  | 15.50940000 |
| C | 19.68780000 | 12.02170000 | 15.59040000 |
| H | 18.83950000 | 12.31120000 | 15.34560000 |
| C | 20.74520000 | 12.27390000 | 14.70930000 |
| C | 20.52380000 | 13.05190000 | 13.47110000 |
| C | 20.10770000 | 14.66350000 | 11.17770000 |
| C | 19.82560000 | 11.37440000 | 16.79240000 |
| C | 13.90950000 | 12.31310000 | 16.66300000 |

|   |             |             |             |
|---|-------------|-------------|-------------|
| C | 15.00100000 | 11.31030000 | 16.59920000 |
| C | 22.01020000 | 11.82840000 | 15.10930000 |
| C | 10.87510000 | 15.38390000 | 17.04240000 |
| C | 11.90840000 | 14.28810000 | 16.85270000 |
| C | 21.11650000 | 10.95980000 | 17.16480000 |
| C | 16.25910000 | 11.64210000 | 17.13210000 |
| H | 16.36600000 | 12.47820000 | 17.52520000 |
| C | 17.34770000 | 10.79110000 | 17.10280000 |
| C | 18.66220000 | 11.16430000 | 17.73910000 |
| H | 18.90450000 | 10.46560000 | 18.36850000 |
| H | 18.53330000 | 11.97890000 | 18.24780000 |
| C | 22.19120000 | 11.16260000 | 16.31130000 |
| H | 23.03680000 | 10.85240000 | 16.54580000 |
| C | 17.15900000 | 9.54190000  | 16.52850000 |
| C | 19.99290000 | 15.58570000 | 9.99640000  |
| C | 20.91280000 | 13.53310000 | 11.12770000 |
| H | 21.31840000 | 13.29620000 | 10.32410000 |
| C | 19.49460000 | 14.95270000 | 12.38300000 |
| H | 18.93150000 | 15.69070000 | 12.44340000 |
| C | 21.12230000 | 12.75600000 | 12.24850000 |
| H | 21.68020000 | 12.01470000 | 12.18470000 |
| C | 19.70040000 | 14.17050000 | 13.49180000 |
| H | 19.27280000 | 14.39890000 | 14.28510000 |
| C | 14.18350000 | 13.65580000 | 16.47160000 |
| H | 15.05730000 | 13.91660000 | 16.28370000 |
| C | 11.61860000 | 12.94860000 | 17.04760000 |
| H | 10.74640000 | 12.69640000 | 17.24760000 |
| C | 13.19870000 | 14.61530000 | 16.55270000 |
| H | 13.41760000 | 15.50660000 | 16.39750000 |
| C | 14.87440000 | 10.05650000 | 16.02500000 |
| C | 12.58840000 | 11.99250000 | 16.95270000 |
| H | 12.35780000 | 11.10120000 | 17.08550000 |
| C | 15.94690000 | 9.18230000  | 15.99400000 |
| H | 15.84450000 | 8.34210000  | 15.60600000 |
| C | 22.51400000 | 9.93550000  | 18.84440000 |
| H | 23.12660000 | 10.68710000 | 18.87550000 |
| H | 22.87590000 | 9.26750000  | 18.23920000 |
| C | 24.38950000 | 11.81020000 | 14.71100000 |
| H | 24.49950000 | 10.85240000 | 14.80760000 |
| H | 24.55050000 | 12.22600000 | 15.57320000 |
| B | 10.93080000 | 16.68760000 | 15.92330000 |
| H | 11.68080000 | 16.75750000 | 15.12140000 |
| C | 18.14140000 | 7.37580000  | 16.07500000 |

|   |             |             |             |
|---|-------------|-------------|-------------|
| H | 17.85240000 | 7.36730000  | 15.14900000 |
| H | 17.49260000 | 6.88840000  | 16.60610000 |
| B | 9.26620000  | 14.97150000 | 17.45970000 |
| H | 8.93780000  | 13.93870000 | 17.64250000 |
| C | 13.43230000 | 8.44950000  | 14.89030000 |
| H | 13.63670000 | 7.73880000  | 15.51800000 |
| H | 14.00930000 | 8.35060000  | 14.11610000 |
| B | 20.36440000 | 17.25340000 | 10.14990000 |
| H | 20.72070000 | 17.71020000 | 11.08450000 |
| B | 10.31640000 | 15.83550000 | 18.58400000 |
| H | 10.65940000 | 15.36170000 | 19.51690000 |
| B | 11.35370000 | 16.89550000 | 17.64770000 |
| H | 12.37990000 | 17.12900000 | 17.97010000 |
| B | 21.38590000 | 16.20360000 | 9.20320000  |
| H | 22.41400000 | 15.96840000 | 9.51710000  |
| B | 10.32940000 | 18.10720000 | 16.81480000 |
| H | 10.68910000 | 19.12290000 | 16.59410000 |
| C | 25.33480000 | 12.32480000 | 13.72810000 |
| H | 25.22000000 | 13.28600000 | 13.65220000 |
| H | 26.23650000 | 12.15610000 | 14.04020000 |
| B | 8.65050000  | 16.38770000 | 18.38750000 |
| H | 7.90850000  | 16.28710000 | 19.19280000 |
| B | 8.66570000  | 17.77320000 | 17.27520000 |
| H | 7.93050000  | 18.58440000 | 17.35970000 |
| B | 9.94270000  | 17.55680000 | 18.48230000 |
| H | 10.04110000 | 18.22310000 | 19.35310000 |
| C | 19.47900000 | 6.75380000  | 16.20090000 |
| H | 19.40520000 | 5.83350000  | 15.90430000 |
| H | 20.07450000 | 7.20540000  | 15.58180000 |
| C | 11.99850000 | 8.37280000  | 14.47650000 |
| H | 11.87470000 | 7.51050000  | 14.04710000 |
| H | 11.47270000 | 8.35740000  | 15.29040000 |
| C | 21.27660000 | 8.82440000  | 22.32950000 |
| H | 21.09740000 | 9.55720000  | 22.92440000 |
| H | 22.04690000 | 8.34380000  | 22.63810000 |
| H | 20.51850000 | 8.23640000  | 22.31220000 |
| C | 22.34470000 | 9.36630000  | 20.18080000 |
| H | 22.54480000 | 8.42730000  | 20.03940000 |
| H | 23.11130000 | 9.71740000  | 20.66020000 |
| C | 20.08740000 | 6.74700000  | 17.43210000 |
| H | 19.50130000 | 6.29020000  | 18.05640000 |
| H | 20.16710000 | 7.66550000  | 17.73390000 |
| C | 21.50820000 | 6.07890000  | 17.51830000 |

|   |             |             |             |
|---|-------------|-------------|-------------|
| H | 21.91640000 | 6.30220000  | 18.35810000 |
| H | 22.05910000 | 6.39930000  | 16.79930000 |
| H | 21.41790000 | 5.12460000  | 17.45110000 |
| C | 25.17530000 | 11.75390000 | 12.47790000 |
| H | 25.26710000 | 10.79280000 | 12.57440000 |
| H | 24.26930000 | 11.92780000 | 12.18130000 |
| C | 11.42590000 | 9.31350000  | 13.64880000 |
| H | 11.95370000 | 9.35610000  | 12.83660000 |
| H | 11.50180000 | 10.17750000 | 14.08330000 |
| C | 9.98590000  | 9.13120000  | 13.24870000 |
| H | 9.41860000  | 9.56570000  | 13.88840000 |
| H | 9.77860000  | 8.19380000  | 13.22110000 |
| H | 9.84180000  | 9.51460000  | 12.38130000 |
| C | 21.52410000 | 9.32880000  | 21.00510000 |
| H | 20.77200000 | 8.96410000  | 20.51370000 |
| H | 21.31170000 | 10.26960000 | 21.11200000 |
| C | 26.02220000 | 12.16120000 | 11.50360000 |
| H | 26.66350000 | 12.77130000 | 11.87260000 |
| H | 25.52380000 | 12.60090000 | 10.81040000 |
| H | 26.47630000 | 11.39950000 | 11.13630000 |

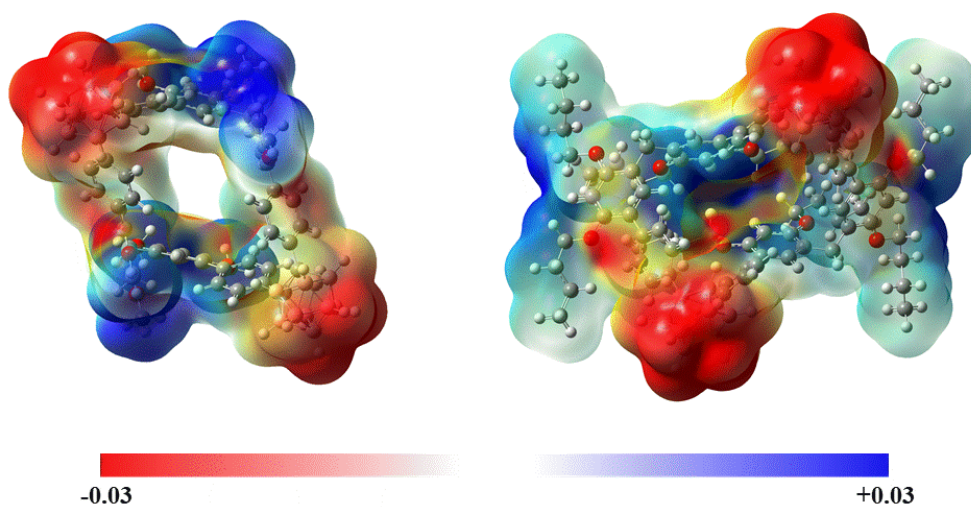

**Figure S18.** Electrostatic potential maps of **3a**(left) and **3b**(right).

### 3. Fluorescence Properties

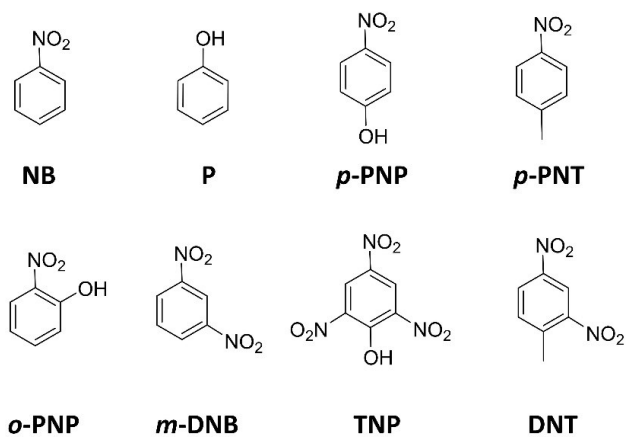

Figure S19. Structure and the abbreviation of guests

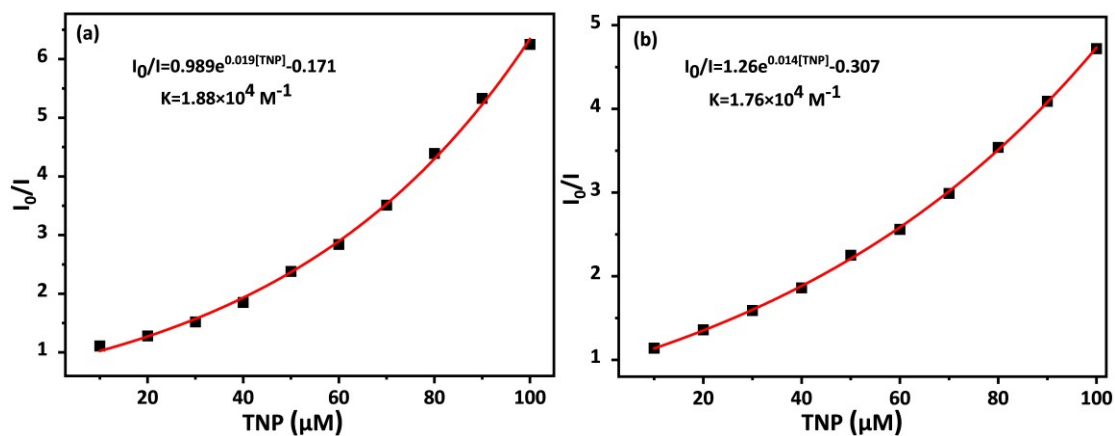

Figure S20. The nonlinear curve-fitting for the quenching constant of (a) 3a and (b) 3b with TNP.

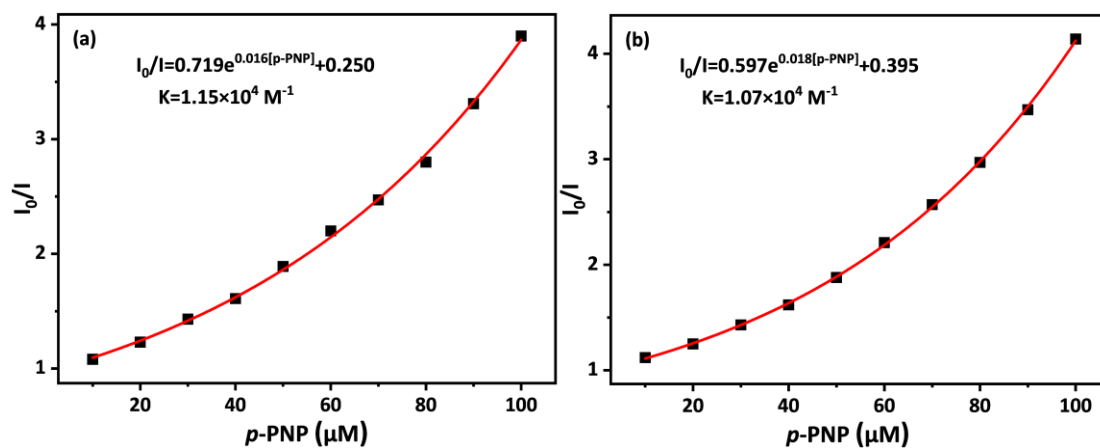

**Figure S21.** The nonlinear curve-fitting for the quenching constant of (a) **3a** and (b) **3b** with *p*-PNP.

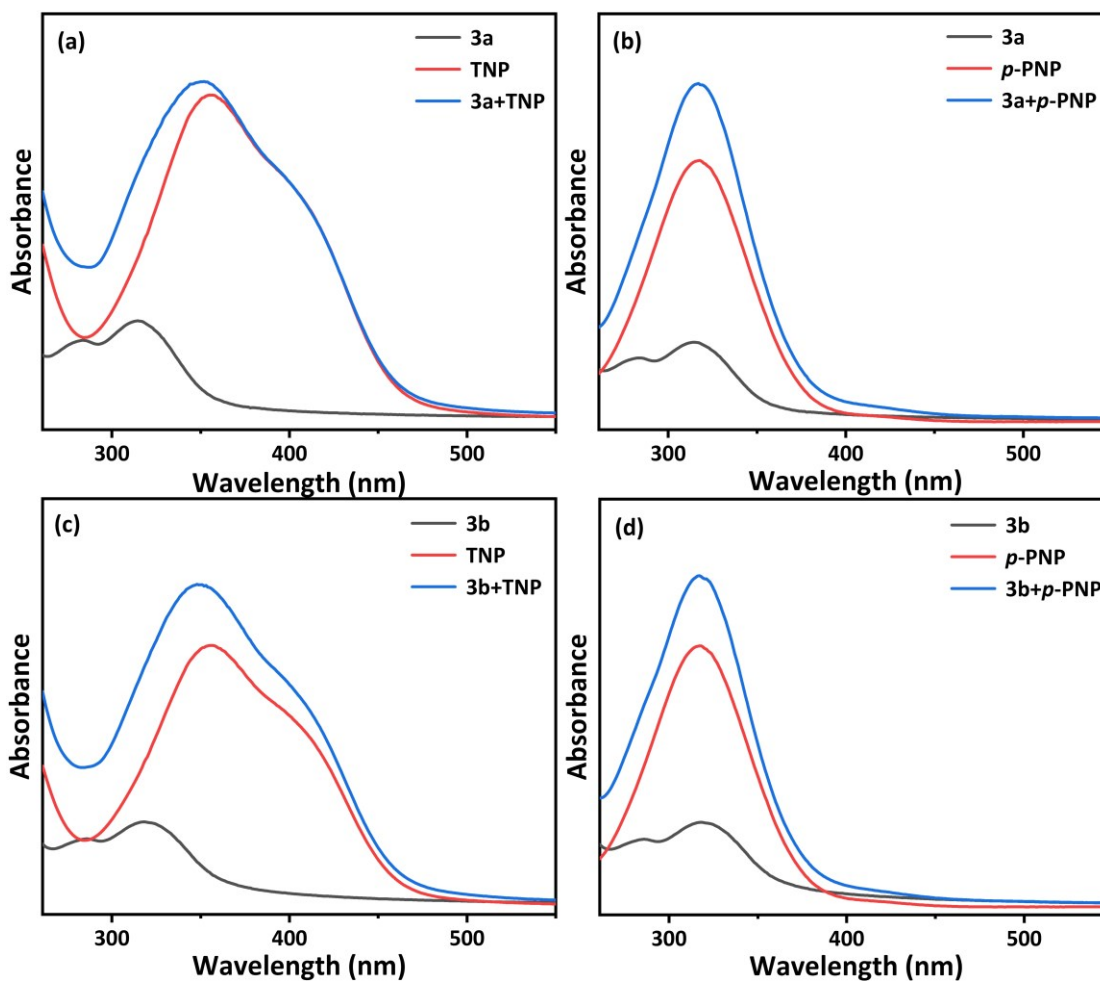

**Figure S22.** UV-vis spectra of **3a**, **3b**, TNP, *p*-PNP, and mixtures in H<sub>2</sub>O/THF (95:5).

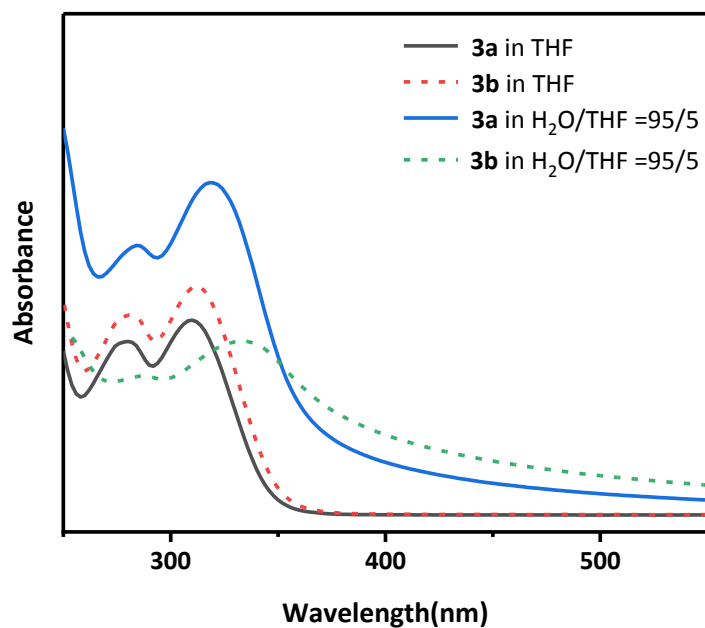

**Figure S23.** UV-vis spectra of **3a**, **3b** in THF and in H<sub>2</sub>O/THF (95:5).

**Table S4.** UV absorption peak data of **3a**, **3b** in THF and in H<sub>2</sub>O/THF (95:5).

| Comp.                                   | $\lambda_{\text{abs}}(\text{nm})$ | $\lambda_{\text{abs}}(\text{nm})$ |
|-----------------------------------------|-----------------------------------|-----------------------------------|
| <b>3a</b> in THF                        | 280                               | 310                               |
| <b>3a</b> in H <sub>2</sub> O/THF =95/5 | 284                               | 318                               |
| <b>3b</b> in THF                        | 282                               | 312                               |
| <b>3b</b> in H <sub>2</sub> O/THF =95/5 | 287                               | 333                               |

Observation of Figure S23 and datas in Table S4 reveals that the H<sub>2</sub>O/THF (95:5) solvent caused red shift in the UV absorption, with the most pronounced red shift being the second UV absorption peak.



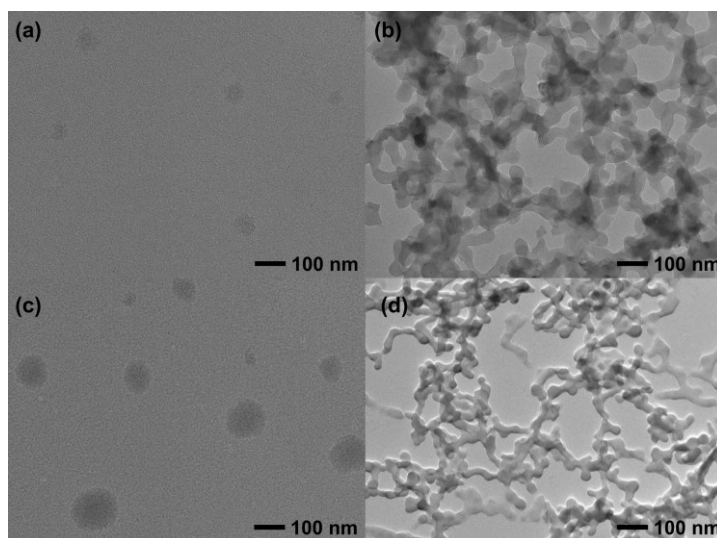

**Figure S24.** The TEM images of **3a** (a) and **3b** (c) in THF solution and **3a** (b) and **3b** (d) in H<sub>2</sub>O/THF (99:1).

### Quantum yields determination:

Absolute quantum yields of all compounds in THF/water or in solid state were measured by employing an integrating sphere. The Principle of Absolute Quantum Yield Measurements. The absolute fluorescence quantum yield,  $\eta$ , is, by definition, the ratio of the number of photons emitted to the number of photons absorbed:

$$\eta = \frac{N^{\text{em}}}{N^{\text{abs}}} \dots\dots\dots(1)$$

There are two different methods for the measurement of the absolute fluorescence quantum yield: “Direct Excitation” measurements and “Direct & Indirect Excitation” measurements. With “Direct Excitation” measurements one records the scatter and the emission of the sample being directly excited by the radiation from the excitation monochromator only, whereas with “Direct and Indirect Excitation” one also records the emission of the sample while it is in a position where it is only indirectly excited by excitation radiation bouncing within the sphere.

### “Direct Excitation” Method

This method only requires two experimental setups, see Figure S25. Note that with the “Direct Excitation” method the emission measurement actually contains the information of both direct and indirect excitation, as photons that pass the sample in the direct excitation beam may still be absorbed after scattering in the sphere.

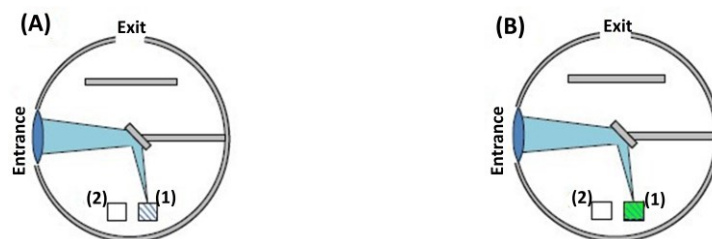

**Figure S25.** Two different measurement configurations required for Direct Excitation measurements:(A) reference sample (solvent only) in sample position (1); (B) test sample in position 1 (position 2 remains empty for both measurements.)

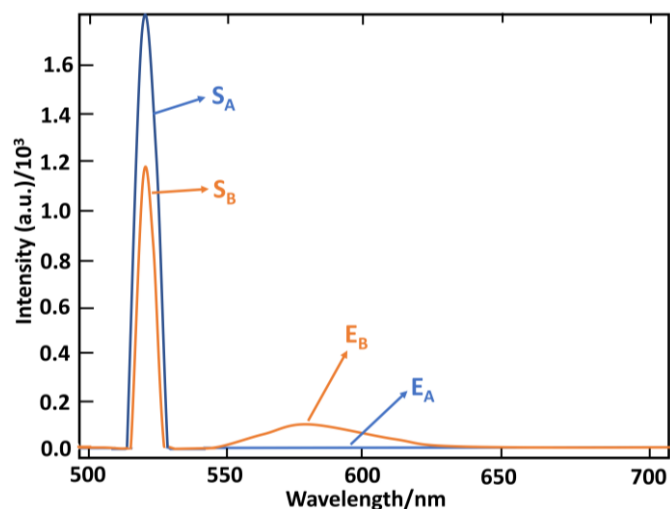

**Figure S26.** Spectral scans of the excitation scatter region or S-region (peaks on the left) and the emission region (E-region) of the sample and the solvent.

The indices “A” and “B” refer to the experimental setup illustrated in Figure S25. Note that the quantities  $S_A$ ,  $S_B$ ,  $E_A$ , and  $E_B$  refer to the integral of the scans.

The absolute fluorescence quantum yield, calculated with the “Direct Excitation” method is calculated as follows:

$$\eta_{DExc} = \frac{E_B - E_A}{S_A - S_B} \dots\dots\dots(2)$$

$E_A(\lambda)$  and  $S_A(\lambda)$ , as well as  $E_B(\lambda)$  and  $S_B(\lambda)$  may be measured in four individual scans. However, it is often convenient to measure these spectra in two scans only. For the calculation of the integrals, the selection of the integral regions, and the final calculation of  $\eta_{DExc}$  use the quantum yield wizard that is supplied with the FLS980 software.

If the sphere background,  $E_A(\lambda)$ , is sufficiently low the measurement of this region may be omitted to save measurement time. In this case the equation degrades to:

$$\eta_{DExc} = \frac{E_B}{S_A - S_B} \dots\dots\dots(3)$$
